# Supplementary material for: Muscular and Kinematic Responses to Unexpected Translational Balance Perturbation: A Pilot Study in Healthy Young Adults
Source: MDPI journal article supplement (doi:10.3390/bioengineering10070831), 2023-07-13
Supplement: s1 [file s1]

Supplementary Materials

# Muscular and Kinematic Responses to Unexpected Translational Balance Perturbation: A Pilot Study in Healthy Young Adults

Cheuk Ying Tong <sup>1,†</sup>, Ringo Tang-Long Zhu <sup>1,2,†</sup>, Yan To Ling <sup>1,3</sup>, Eduardo Mendonça Scheeren <sup>4</sup>, Freddy Man Hin Lam <sup>5</sup>, Hong Fu <sup>6,\*</sup>, and Christina Zong-Hao Ma <sup>1,2,\*</sup>

<sup>1</sup> Department of Biomedical Engineering, The Hong Kong Polytechnic University, Hong Kong SAR 999077, China; cheuk-ying.tong@connect.polyu.hk (C.Y.T.), ringo-tanglong.zhu@connect.polyu.hk (R.T.-L.Z.), jane.yt.ling@connect.polyu.hk (Y.T.L.)

<sup>2</sup> Research Institute for Smart Ageing, The Hong Kong Polytechnic University, Hong Kong SAR 999077, China

<sup>3</sup> Centre for Developmental Neurobiology, King's College London, London SE1 1UL, UK

<sup>4</sup> Graduate Program in Health Technology, Pontifícia Universidade Católica do Paraná, Curitiba 80215-901, Brazil; eduardo.scheeren@pucpr.br (E.M.S.)

<sup>5</sup> Department of Rehabilitation Sciences, The Hong Kong Polytechnic University, Hong Kong SAR 999077, China; freddy-mh.lam@polyu.edu.hk (F.M.H.L.)

<sup>6</sup> Department of Mathematics and Information Technology, The Education University of Hong Kong, Hong Kong SAR 999077, China; hfu@eduhk.hk (H.F.)

\* Correspondence: czh.ma@polyu.edu.hk (C.Z.-H.M.); hfu@eduhk.hk (H.F.); Tel.: +852-2766-7671 (C.Z.-H.M.); Fax: +852-2334-2429 (C.Z.-H.M.).

† These authors contributed equally to this work.

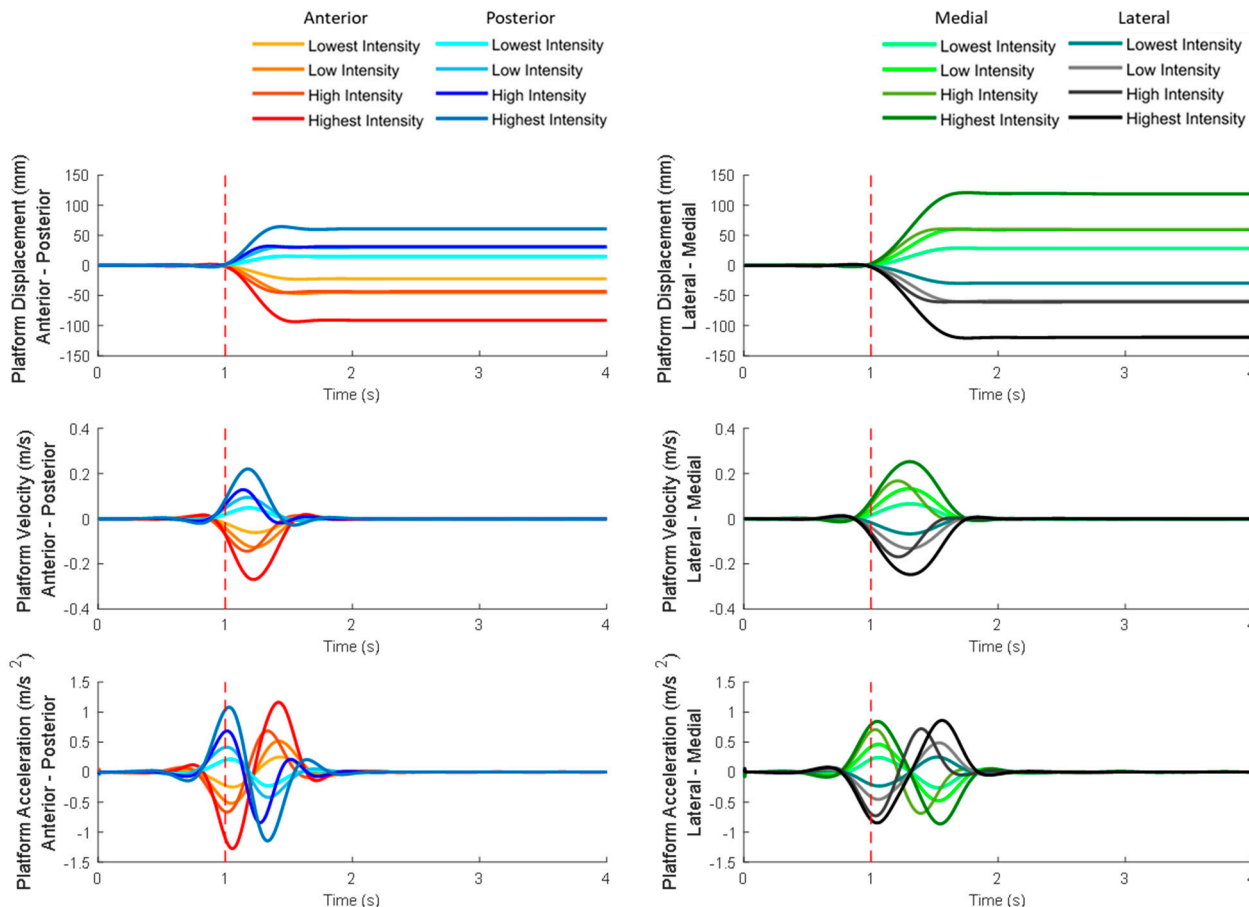

**Figure S1.** The mean platform displacements, velocities, and accelerations of twelve subjects following the unexpected anterior, posterior, medial, and lateral perturbations with four intensities ( $n = 12$ ). (Note: **Red dotted line** specifies the start of the balance perturbation.).

**Table S1.** Mean and ICC values of pulling parameters examining the reliability of the moving-platform balance perturbation system ( $n = 12$ ).

| Direction | Intensity | Pulling      |        | Max. Displacement |        | Normalized Max. Displacement |        | Max. Velocity of |        | Max. Acceleration               |        |
|-----------|-----------|--------------|--------|-------------------|--------|------------------------------|--------|------------------|--------|---------------------------------|--------|
|           |           | Duration (s) |        | of Platform (cm)  |        | of Platform (% Height)       |        | Platform (m/s)   |        | of Platform (m/s <sup>2</sup> ) |        |
|           |           | Mean         | ICC    | Mean              | ICC    | Mean                         | ICC    | Mean             | ICC    | Mean                            | ICC    |
| Anterior  | Highest   | 0.379        | 0.989* | 9.4               | 0.859* | 5.5                          | 0.729* | 0.27             | 0.930* | 1.28                            | 0.944* |
|           | High      | 0.245        | 0.983* | 4.5               | 0.968* | 2.7                          | 0.965* | 0.14             | 0.981* | 0.69                            | 0.991* |
|           | Low       | 0.359        | 0.979* | 4.7               | 0.712* | 2.7                          | 0.703* | 0.13             | 0.943* | 0.53                            | 0.987* |
|           | Lowest    | 0.350        | 0.866* | 2.3               | 0.919* | 1.3                          | 0.919* | 0.06             | 0.934* | 0.26                            | 0.976* |
| Posterior | Highest   | 0.251        | 0.976* | 6.5               | 0.716* | 3.8                          | 0.565* | 0.22             | 0.849* | 1.10                            | 0.952* |
|           | High      | 0.162        | 0.954* | 3.4               | 0.631* | 2.0                          | 0.499* | 0.13             | 0.822* | 0.74                            | 0.967* |
|           | Low       | 0.238        | 0.979* | 3.1               | 0.955* | 1.8                          | 0.936* | 0.09             | 0.981* | 0.43                            | 0.994* |
|           | Lowest    | 0.231        | 0.977* | 1.5               | 0.268* | 0.9                          | 0.493* | 0.05             | 0.971* | 0.24                            | 0.992* |
| Medial    | Highest   | 0.507        | 0.995* | 12.1              | 0.895* | 7.1                          | 0.703* | 0.25             | 0.933* | 0.85                            | 0.971* |
|           | High      | 0.328        | 0.976* | 6.1               | 0.888* | 3.6                          | 0.213* | 0.17             | 0.817* | 0.72                            | 0.988* |
|           | Low       | 0.480        | 0.995* | 6.0               | 0.725* | 3.5                          | 0.394* | 0.13             | 0.913* | 0.47                            | 0.978* |
|           | Lowest    | 0.466        | 0.992* | 2.9               | 0.651* | 1.7                          | 0.535* | 0.07             | 0.855* | 0.25                            | 0.958* |
| Lateral   | Highest   | 0.440        | 1.000* | 12.1              | 0.800* | 7.1                          | 0.521* | 0.25             | 0.539* | 0.86                            | 0.949* |
|           | High      | 0.472        | 0.999* | 6.2               | 0.807* | 3.6                          | 0.620* | 0.17             | 0.628* | 0.74                            | 0.973* |
|           | Low       | 0.434        | 1.000* | 6.0               | 0.912* | 3.5                          | 0.696* | 0.13             | 0.897* | 0.46                            | 0.968* |
|           | Lowest    | 0.434        | 0.999* | 3.0               | 0.886* | 1.7                          | 0.718* | 0.07             | 0.774* | 0.24                            | 0.944* |

Note: The intraclass correlation coefficient (ICC) of three perturbations with the same direction and intensity in 12 subjects was calculated. Max.: Maximal. \* Significant difference existed in the intraclass correlation coefficient test ( $p < 0.05$ ).
